# Supplementary material
Source: PubMed Central journal article supplement (PMC3697517)
Supplement: AEM.00035-13_zam999104515so1.pdf [file AEM.00035-13_zam999104515so1.pdf]

Supplemental material:

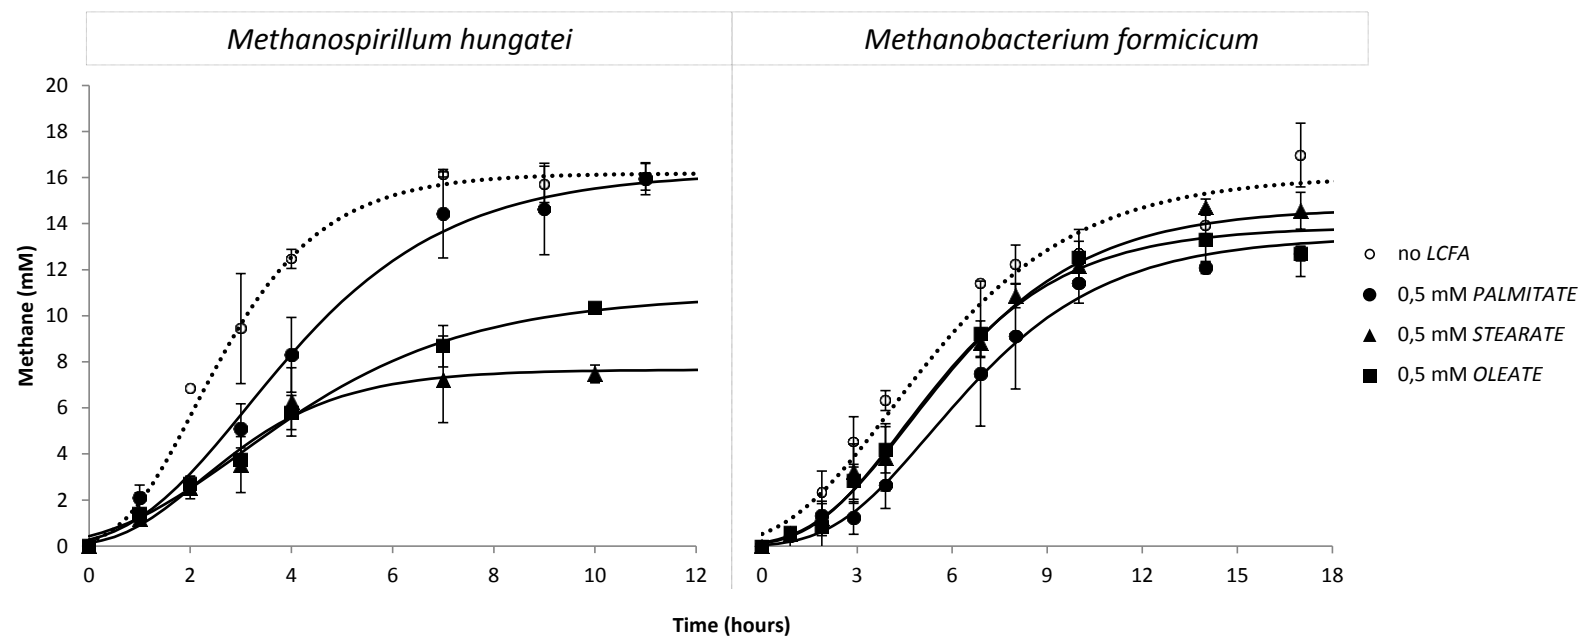

**Figure S1:** Methane production by pure cultures of *M. hungatei* and *M. formicicum* growing on H<sub>2</sub>/CO<sub>2</sub>, without LCFA addition and in the presence of 0.5 mM LCFA.
